# Supplementary material for: Phenyl-incorporated polyorganosilica membranes with enhanced hydrothermal stability for H2/CO2 separation
Source: Royal Society of Chemistry journal article supplement (doi:10.1039/d4ta02713b), 2024-01-01
Supplement: d4ta02713b1.pdf [file d4ta02713b1.pdf]

## Supporting Information

### **Phenyl-Incorporated Polyorganosilica Membranes with Enhanced Hydrothermal Stability for H<sub>2</sub>/CO<sub>2</sub> Separation**

Vinh Bui<sup>1</sup>, Varun R. Satti<sup>1</sup>, Elizabeth Haddad<sup>1</sup>, Ameya Manoj Tandel<sup>1</sup>, Narjes Esmacili<sup>1</sup>, Sai Srikar Chundury<sup>1</sup>, Fathy Attia<sup>1</sup>, Lingxiang Zhu<sup>2,3</sup>, and Haiqing Lin<sup>\*1</sup>

<sup>1</sup> Department of Chemical and Biological Engineering, University at Buffalo, The State University of New York, Buffalo, NY 14260, United States

<sup>2</sup> U.S. Department of Energy, National Energy Technology Laboratory, Pittsburgh, PA 15236, United States

<sup>3</sup> NETL Support Contractor, 626 Cochran Mill Road, P.O. Box 10940, Pittsburgh, PA 15236, United States

\* Corresponding author: Haiqing Lin, E-mail: haiqingl@buffalo.edu

## 1. Supplementary figures

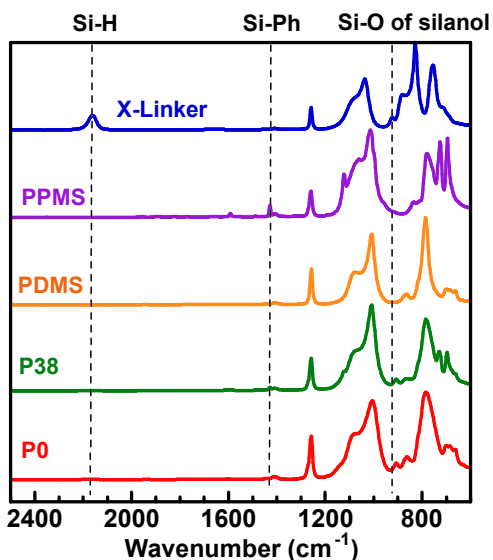

**Fig. S1.** FTIR spectra of polymer precursors and the assigned peaks: Si-H (2165 cm<sup>-1</sup>), Si-Ph (1430 cm<sup>-1</sup>), and Si-O stretching in Si-OH (907 cm<sup>-1</sup>). The disappearance of Si-H in P0 and P38 confirms a successful hydrosilylation reaction, and the appearance of Si-O in Si-OH suggests the hydrolysis and oxidation reaction of the Si-H group.<sup>1</sup>

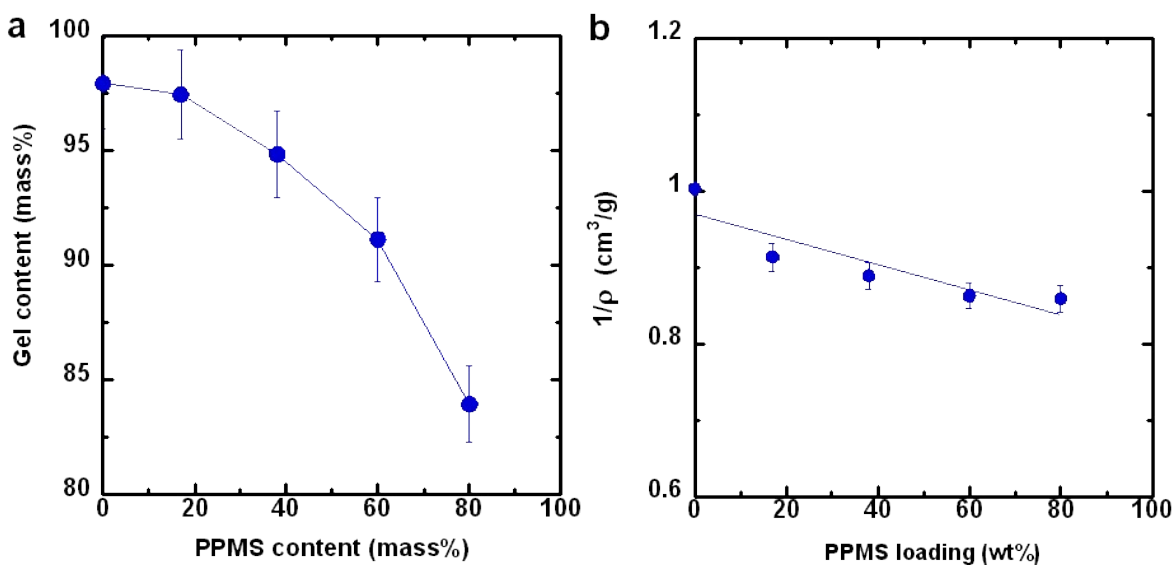

**Fig. S2.** Characterization of Pxx freestanding films as a function of the PPMS loading, including (a) gel content and (b) density.

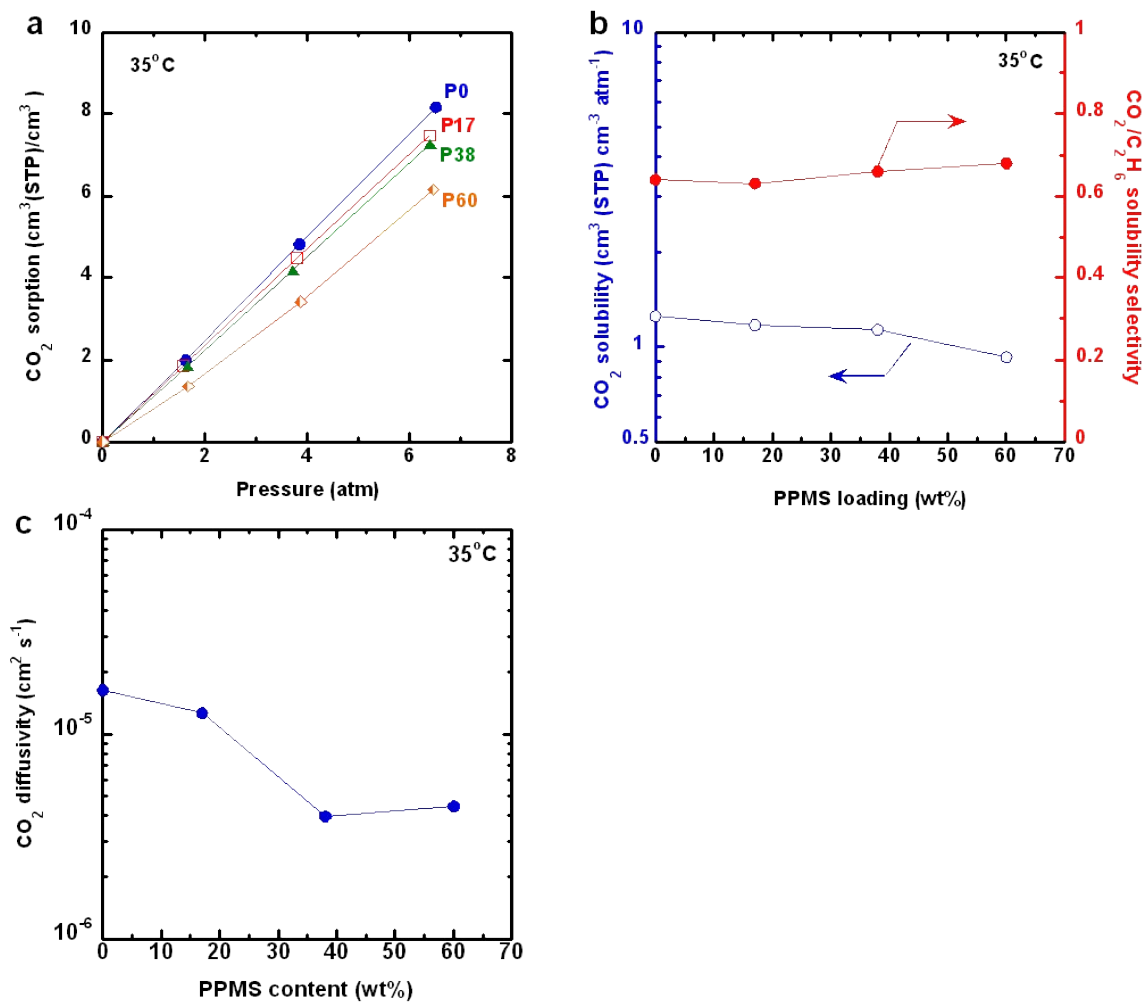

**Fig. S3.** Sorption and diffusion in Pxx films at 35 °C. (a) CO<sub>2</sub> sorption isotherms, (b) CO<sub>2</sub> solubility and CO<sub>2</sub>/C<sub>2</sub>H<sub>6</sub> solubility selectivity, and (c) CO<sub>2</sub> diffusivity. H<sub>2</sub> and N<sub>2</sub> sorption is below our detection limit, and therefore, non-polar C<sub>2</sub>H<sub>6</sub> is used as a marker.

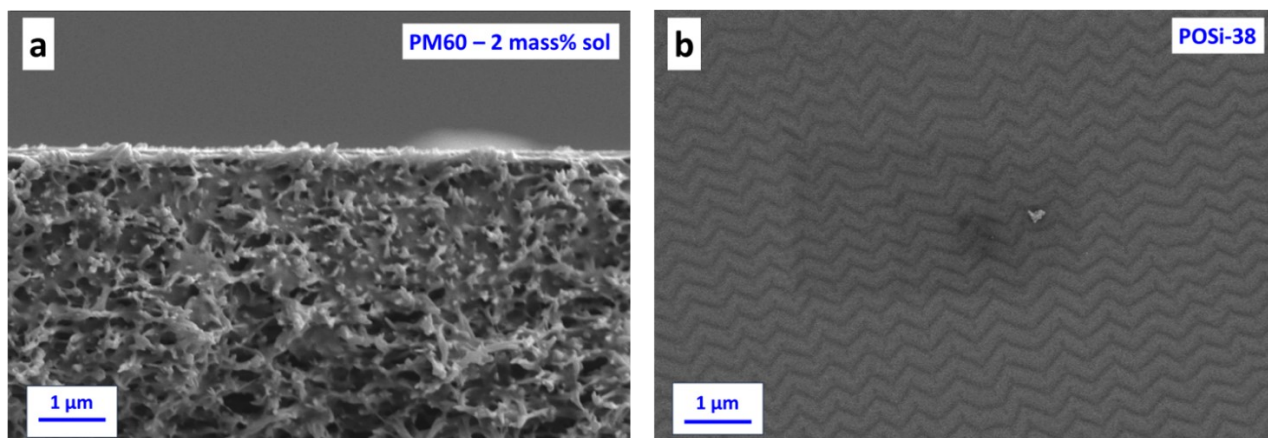

**Fig. S4.** (a) Cross-section SEM image of PM60 membrane prepared at 2 mass% solution, where severe pore penetration of polysiloxane leads to non-uniform coating of polysiloxane layer, and thus unsuitable for POSi membrane fabrication. (b) Surface SEM of POSi38.

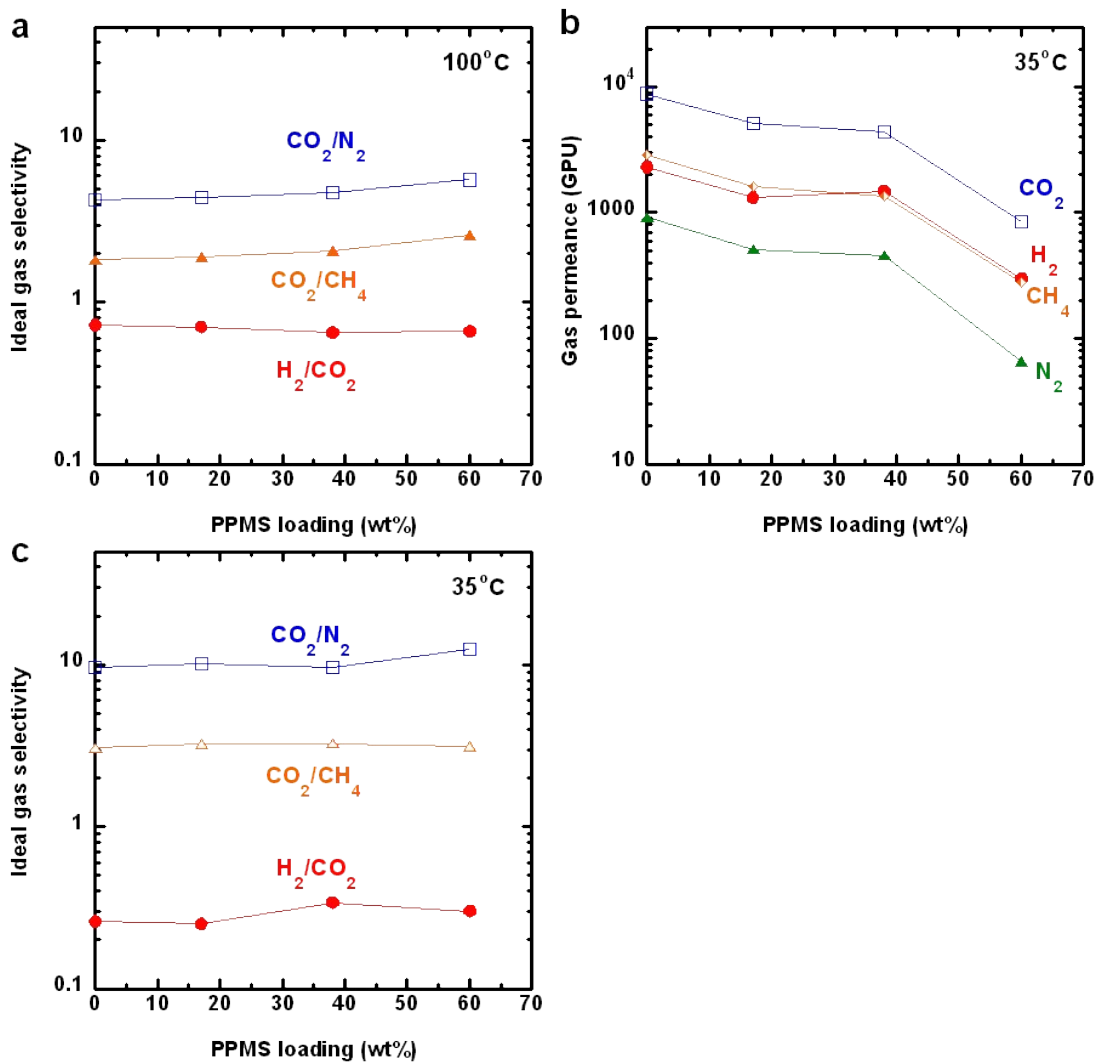

**Fig. S5.** Pure-gas transport properties of PMxx membranes. (a) Gas selectivity at 100 °C. (b) Gas permeance and (c) selectivity at 35 °C.

## 2. Supplementary tables

**Table S1.** Hydrothermal stability of representative silica membranes for gas separations. TEOS: tetraethyl orthosilicate; BTESE: 1,2-bis(triethoxysilyl)ethane; BTESP: bis(triethoxysilyl)propane; DMDPS: dimethoxydiphenylsilane; and MTES: methyltriethoxysilane.

| Silica membranes            | Fabrication | Hydrothermal conditions |           |              | Test temp. (°C) | Separation (A/B)                | Before HT             |                 | After HT              |                 |
|-----------------------------|-------------|-------------------------|-----------|--------------|-----------------|---------------------------------|-----------------------|-----------------|-----------------------|-----------------|
|                             |             | Water vapor (kPa)       | Temp (°C) | Duration (h) |                 |                                 | Gas A permeance (GPU) | A/B selectivity | Gas A permeance (GPU) | A/B selectivity |
| TEOS <sup>2</sup>           | CVD         | 16.5                    | 600       | 130          | 600             | H <sub>2</sub> /CO <sub>2</sub> | 1450                  | 1500            | 160                   | 520             |
| DMDPS <sup>3</sup>          | CVD         | 3.4                     | 300       | 226          | 300             | H <sub>2</sub> /N <sub>2</sub>  | 2100                  | ~900            | 2100                  | ~1000           |
| Al-doped TEOS <sup>2</sup>  | CVD         | 16.5                    | 600       | 130          | 600             | H <sub>2</sub> /CO <sub>2</sub> | 590                   | 400             | 447                   | 70              |
| BTESE <sup>4</sup>          | Sol-gel     | 101                     | 100       | 72           | 200             | H <sub>2</sub> /CO <sub>2</sub> | 1340                  | ~3              | 1200                  | ~3              |
| Zr-doped BTESE <sup>4</sup> | Sol-gel     | 101                     | 100       | 72           | 200             | H <sub>2</sub> /CO <sub>2</sub> | 540                   | 12              | ~300                  | 12              |
| Nb-doped BTESE <sup>5</sup> | Sol-gel     | 150                     | 200       | 300          | 200             | H <sub>2</sub> /CO <sub>2</sub> | 205                   | 115             | 92                    | 206             |
| F-doped BTESP <sup>6</sup>  | Sol-gel     | 50                      | 300       | 7            | 200             | He/CF <sub>4</sub>              | 1200                  | 100             | 1500                  | 100             |

**Table S2.** Prepolymer composition, glass transition temperature, and gas transport properties at 35 °C and 60 psig for Pxx films.

| Pxx | Prepolymer composition (mass%) |       |      | Phenyl (mass%) | T <sub>g</sub> (°C) | Gas permeability (Barrer) |                 |                |                 | Selectivity                     |                                  |                                 |
|-----|--------------------------------|-------|------|----------------|---------------------|---------------------------|-----------------|----------------|-----------------|---------------------------------|----------------------------------|---------------------------------|
|     | vPDMS                          | vPPMS | PMHS |                |                     | H <sub>2</sub>            | CO <sub>2</sub> | N <sub>2</sub> | CH <sub>4</sub> | CO <sub>2</sub> /N <sub>2</sub> | CO <sub>2</sub> /CH <sub>4</sub> | H <sub>2</sub> /CO <sub>2</sub> |
| P0  | 77                             | 0     | 23   | 0              | < -90               | 770                       | 2700            | 290            | 890             | 9.3                             | 3.3                              | 0.28                            |
| P17 | 63                             | 17    | 21   | 9.5            | -60                 | 550                       | 2200            | 200            | 670             | 11                              | 3.3                              | 0.25                            |
| P38 | 45                             | 38    | 17   | 22             | -28                 | 400                       | 2000            | 150            | 430             | 13                              | 4.5                              | 0.21                            |
| P60 | 26                             | 60    | 13   | 34             | -26                 | 150                       | 590             | 41             | 120             | 14                              | 4.9                              | 0.25                            |
| P80 | 11                             | 80    | 9    | 45             | -25                 | 82                        | 300             | 18             | 32              | 17                              | 9.4                              | 0.25                            |

**Table S3.** Surface morphology of PM<sub>xx</sub> and POSi<sub>xx</sub> membranes. The estimated area increase is calculated by dividing the arclength of the wave structure over the straight length that covers the wave structure. The arclength is determined using ImageJ analysis.

| Membranes | Thickness (nm) |          | Wavelength (nm) | Amplitude (nm) | Surface area increase |
|-----------|----------------|----------|-----------------|----------------|-----------------------|
|           | F-20           | SEM      |                 |                |                       |
| PM0       | 340 ± 60       | 260 ± 20 | -               | -              | -                     |
| PM17      | 390 ± 70       | 330 ± 70 | -               | -              | -                     |
| PM38      | 330 ± 70       | 400 ± 20 | -               | -              | -                     |
| PM60      | 990 ± 60       | 950 ± 50 | -               | -              | -                     |
| POSi-0    | -              | 340 ± 30 | 340 ± 20        | 23 ± 4         | 4%                    |
| POSi-17   | -              | 370 ± 40 | 430 ± 10        | 36 ± 8         | 7%                    |
| POSi-38   | -              | 360 ± 30 | 450 ± 30        | 35 ± 3         | 6%                    |
| POSi-60   | -              | 990 ± 40 | 230 ± 20        | 30 ± 5         | 15%                   |

**Table S4.** Surface atomic ratio of P<sub>xx</sub>, POSi<sub>xx</sub>, and HT-POSi<sub>xx</sub>.

| Samples                               | Atomic composition (mol%) |           |          | Atomic molar ratio |           |           |
|---------------------------------------|---------------------------|-----------|----------|--------------------|-----------|-----------|
|                                       | C                         | O         | Si       | O/Si               | C/O       | C/Si      |
| <b><i>Polysiloxanes</i></b>           |                           |           |          |                    |           |           |
| P0                                    | 49.8 ± 1.3                | 27.2±0.7  | 22.9±0.7 | 1.19±0.05          | 1.83±0.07 | 2.18±0.09 |
| P17                                   | 52.4 ± 1.2                | 25.7±0.6  | 21.9±0.6 | 1.18±0.04          | 2.04±0.07 | 2.40±0.08 |
| P38                                   | 54.0 ± 0.9                | 24.9±0.4  | 21.1±0.1 | 1.18±0.04          | 2.17±0.05 | 2.56±0.08 |
| P60                                   | 55.4 ± 0.6                | 24.2±0.4  | 20.4±0.2 | 1.18±0.02          | 2.29±0.04 | 2.71±0.03 |
| <b><i>Polyorganosilica (POSi)</i></b> |                           |           |          |                    |           |           |
| POSi0                                 | 21.7±0.6                  | 51.9±0.76 | 26.4±0.2 | 1.97±0.03          | 0.42±0.01 | 0.82±0.02 |
| POSi38                                | 29.8±1.9                  | 45.6±1.81 | 24.6±0.1 | 1.86±0.07          | 0.66±0.05 | 1.21±0.08 |
| POSi60                                | 26.0±1.1                  | 49.5±0.91 | 24.5±0.3 | 2.0±0.1            | 0.52±0.02 | 1.06±0.05 |
| <b><i>HT-POSi</i></b>                 |                           |           |          |                    |           |           |
| HT-POSi0                              | 28.3±0.6                  | 45.3±0.8  | 26.4±0.4 | 1.72±0.04          | 0.63±0.02 | 1.07±0.03 |
| HT-POSi38                             | 31.3±1.0                  | 44.1 ±1.0 | 24.6±0.2 | 1.79±0.04          | 0.71±0.03 | 1.27±0.04 |
| HT-POSi60                             | 29.5±1.2                  | 45.8±1.1  | 24.7±0.1 | 1.85±0.05          | 0.64±0.03 | 1.19±0.05 |

**Table S5.** XPS peak deconvolution of Pxx, POSixx, and HT-POSixx.

| Samples                               | C 1s deconvolution (%)   |                 | Si 2p deconvolution (%)           |                                   |                                   |
|---------------------------------------|--------------------------|-----------------|-----------------------------------|-----------------------------------|-----------------------------------|
|                                       | C-H or C-C<br>(284.6 eV) | C-O<br>(286 eV) | Si-(O) <sub>2</sub><br>(102.1 eV) | Si-(O) <sub>3</sub><br>(102.8 eV) | Si-(O) <sub>4</sub><br>(103.4 eV) |
| <b><i>Pristine polysiloxanes</i></b>  |                          |                 |                                   |                                   |                                   |
| P0                                    | 100                      | 0               | 70                                | 30                                | 0                                 |
| P17                                   | 100                      | 0               | 70                                | 30                                | 0                                 |
| P38                                   | 100                      | 0               | 77                                | 23                                | 0                                 |
| P60                                   | 100                      | 0               | 71                                | 29                                | 0                                 |
| <b><i>Polyorganosilica (POSi)</i></b> |                          |                 |                                   |                                   |                                   |
| POSi0                                 | 87                       | 13              | 12                                | 15                                | 73                                |
| POSi38                                | 85                       | 15              | 20                                | 24                                | 56                                |
| POSi60                                | 87                       | 13              | 18                                | 16                                | 66                                |
| <b><i>HT-POSi</i></b>                 |                          |                 |                                   |                                   |                                   |
| HT-POSi0                              | 81                       | 19              | 15                                | 25                                | 60                                |
| HT-POSi38                             | 81                       | 19              | 20                                | 18                                | 62                                |
| HT-POSi60                             | 85                       | 15              | 15                                | 17                                | 68                                |

**Table S6.** Gas permeance of the PMxx membranes and the ratio of the estimated gas permeability to the measured values for the corresponding Pxx films at 35 °C.

| Membranes | F20<br>Thickness<br>(nm) | Gas permeance (GPU) |                 |                |                 | Permeability ratio |                 |                |                 |
|-----------|--------------------------|---------------------|-----------------|----------------|-----------------|--------------------|-----------------|----------------|-----------------|
|           |                          | H <sub>2</sub>      | CO <sub>2</sub> | N <sub>2</sub> | CH <sub>4</sub> | H <sub>2</sub>     | CO <sub>2</sub> | N <sub>2</sub> | CH <sub>4</sub> |
| PM0       | 340 ± 60                 | 2300                | 8800            | 920            | 2900            | 1.0                | 1.1             | 1.1            | 1.1             |
| PM17      | 390 ± 70                 | 1300                | 5200            | 510            | 1600            | 0.92               | 0.92            | 1.0            | 0.93            |
| PM38      | 330 ± 70                 | 1500                | 4400            | 460            | 1350            | 1.2                | 0.72            | 1.0            | 1.0             |
| PM60      | 990 ± 60                 | 310                 | 870             | 70             | 280             | 2.0                | 1.4             | 1.7            | 2.3             |



**Table S7.** Effect of the feed pressure on pure-gas transport properties of POSi membranes at 100 °C.

| Membranes | Feed pressure (psig) | Gas permeance (GPU) |                 |                |                 | Selectivity                     |                                 |
|-----------|----------------------|---------------------|-----------------|----------------|-----------------|---------------------------------|---------------------------------|
|           |                      | H <sub>2</sub>      | CO <sub>2</sub> | N <sub>2</sub> | CH <sub>4</sub> | H <sub>2</sub> /CO <sub>2</sub> | H <sub>2</sub> /CH <sub>4</sub> |
| POSi0     | 20                   | 140                 | 2.3             | 0.28           | 0.45            | 61                              | 311                             |
|           | 40                   | 140                 | 2.4             | 0.29           | 0.46            | 58                              | 304                             |
|           | 60                   | 140                 | 2.5             | 0.29           | 0.41            | 56                              | 341                             |
| POSi17    | 20                   | 160                 | 2.5             | 0.76           | 1.2             | 64                              | 133                             |
|           | 40                   | 160                 | 2.7             | 0.81           | 1.1             | 59                              | 145                             |
|           | 60                   | 160                 | 2.9             | 0.86           | 1.0             | 55                              | 160                             |
| POSi38    | 20                   | 130                 | 3.1             | 1.4            | 1.6             | 42                              | 81                              |
|           | 40                   | 140                 | 3.5             | 1.4            | 1.5             | 40                              | 93                              |
|           | 60                   | 140                 | 3.5             | 1.4            | 1.5             | 40                              | 93                              |
| POSi60    | 40                   | 120                 | 5.7             | 1.3            | 1.6             | 21                              | 75                              |
|           | 60                   | 120                 | 5.8             | 1.3            | 1.5             | 21                              | 80                              |

**Table S8.** Calculated gas permeance through different regions of POSi membranes using resistance in a parallel and series model.

| Membranes | Gases           | $Q_A$ (GPU) | Silica layer     |                   |                   | Polysiloxane layer |                        |
|-----------|-----------------|-------------|------------------|-------------------|-------------------|--------------------|------------------------|
|           |                 |             | $Q_{A,Si}$ (GPU) | $Q_{A,dSi}$ (GPU) | $Q_{A,kSi}$ (GPU) | $Q_{A,PM}$ (GPU)   | Resistance portion (%) |
| POSi0     | H <sub>2</sub>  | 140         | 151              | 150               | 1.2               | 3300               | 4.2                    |
|           | CO <sub>2</sub> | 2.5         | 2.4              | 2.2               | 0.25              | 4600               | 0.05                   |
|           | N <sub>2</sub>  | 0.30        | 0.31             | ~ 0               | 0.31              | 1100               | 0.03                   |
|           | CH <sub>4</sub> | 0.41        | 0.41             | 0                 | 0.41              | 2500               | 0.02                   |
| POSi17    | H <sub>2</sub>  | 160         | 183              | 180               | 2.8               | 1600               | 10                     |
|           | CO <sub>2</sub> | 2.9         | 2.9              | 2.3               | 0.60              | 2300               | 0.13                   |
|           | N <sub>2</sub>  | 0.86        | 0.86             | 0.10              | 0.76              | 530                | 0.16                   |
|           | CH <sub>4</sub> | 1.0         | 1.0              | 0                 | 1.0               | 1200               | 0.08                   |
| POSi38    | H <sub>2</sub>  | 140         | 174              | 170               | 4.3               | 950                | 15                     |
|           | CO <sub>2</sub> | 3.5         | 3.5              | 2.6               | 0.91              | 1500               | 0.23                   |
|           | N <sub>2</sub>  | 1.4         | 1.4              | 0.28              | 1.1               | 310                | 0.45                   |
|           | CH <sub>4</sub> | 1.5         | 1.5              | 0                 | 1.5               | 710                | 0.21                   |
| POSi60    | H <sub>2</sub>  | 120         | 194              | 190               | 4.3               | 320                | 38                     |
|           | CO <sub>2</sub> | 5.8         | 5.9              | 5.0               | 0.91              | 490                | 1.2                    |
|           | N <sub>2</sub>  | 1.3         | 1.3              | 0.21              | 1.1               | 86                 | 1.5                    |
|           | CH <sub>4</sub> | 1.5         | 1.5              | 0                 | 1.5               | 190                | 0.79                   |

**Table S9.** H<sub>2</sub>/CO<sub>2</sub> separation performance of POSi before and after vapor treatment at 100 °C.

| Membranes | Before vapor treatment         |                                             | After vapor treatment          |                                             |
|-----------|--------------------------------|---------------------------------------------|--------------------------------|---------------------------------------------|
|           | H <sub>2</sub> permeance (GPU) | H <sub>2</sub> /CO <sub>2</sub> selectivity | H <sub>2</sub> permeance (GPU) | H <sub>2</sub> /CO <sub>2</sub> selectivity |
| POSi0     | 143                            | 57                                          | 160                            | 16                                          |
| POSi17    | 159                            | 59                                          | 150                            | 8.5                                         |
| POSi38    | 144                            | 41                                          | 98                             | 19                                          |
| POSi60    | 130                            | 13                                          | 110                            | 11                                          |

### References

1. K. Efimenko, W. E. Wallace and J. Genzer, *J. Colloid Interface Sci.*, 2002, **254**, 306-315.
2. Y. Gu, P. Hacarlioglu and S. T. Oyama, *J. Membr. Sci.*, 2008, **310**, 28-37.
3. Y. Ohta, K. Akamatsu, T. Sugawara, A. Nakao, A. Miyoshi and S.-I. Nakao, *J. Membr. Sci.*, 2008, **315**, 93-99.
4. M. ten Hove, M. W. J. Luiten-Olieman, C. Huiskes, A. Nijmeijer and L. Winnubst, *Sep. Purif. Technol.*, 2017, **189**, 48-53.
5. H. Qi, H. Chen, L. Li, G. Zhu and N. Xu, *J. Membr. Sci.*, 2012, **421-422**, 190-200.
6. I. Rana, H. Nagasawa, K. Yamamoto, T. Gunji, T. Tsuru and M. Kanezashi, *J. Membr. Sci.*, 2022, **644**, 120083.
